# Supplementary material
Source: ML conference proceedings conference paper supplement (https://proceedings.neurips.cc/paper_files/paper/2021/hash/8230bea7d54bcdf99cdfe85cb07313d5-Abstract.html)
Supplement: Supplementary file 1 [file 8230bea7d54bcdf99cdfe85cb07313d5-Supplemental.pdf]

## Appendix

For a given set of atomic propositions  $AP$ , the syntax of LTL formulas over  $AP$  is defined as:

$$\varphi, \psi ::= \top \mid a \mid \neg\varphi \mid \varphi \wedge \psi \mid \bigcirc\varphi \mid \varphi \mathcal{U} \psi ,$$

where  $\top$  is the Boolean constant,  $a \in AP$ ,  $\neg$  and  $\wedge$  are the Boolean connectives and  $\bigcirc$  and  $\mathcal{U}$  are temporal operators. We refer to  $\bigcirc$  as the *next* operator and to  $\mathcal{U}$  as the *until* operator. Other Boolean connectives can be derived. Further, we can derive temporal modalities such as *eventually*  $\Diamond\varphi := \top \mathcal{U} \varphi$  and *globally*  $\Box\varphi := \neg\Diamond\neg\varphi$ . For a given set of atomic propositions  $AP$ , the semantics of an LTL formula over  $AP$  is defined with respect to the set of infinity words over the alphabet  $2^{AP}$  denoted by  $(2^{AP})^\omega$ . The semantics of an LTL formula  $\varphi$  is defined as the language  $Words(\varphi) = \{\sigma \in (2^{AP})^\omega \mid \sigma \models \varphi\}$  where  $\models$  is the smallest relation satisfying the following properties:

$$\begin{array}{ll} \sigma \models \top & \\ \sigma \models a & \text{iff } a \in A_0 \\ \sigma \models \neg\varphi & \text{iff } \sigma \not\models \varphi \\ \sigma \models \varphi \wedge \psi & \text{iff } \sigma \models \varphi \text{ and } \sigma \models \psi \\ \sigma \models \bigcirc\varphi & \text{iff } \sigma[1\dots] \models \varphi \\ \sigma \models \varphi \mathcal{U} \psi & \text{iff } \exists j \geq 0. \sigma[j\dots] \models \psi \text{ and } \forall 0 \leq i < j. \sigma[i\dots] \models \varphi \end{array}$$

where  $\sigma = A_0A_1\dots \in (2^{AP})^\omega$  and  $\sigma[i\dots] = A_iA_{i+1}\dots$  denotes the suffix of  $\sigma$  starting at  $i$ .

Listing 1: Specification of a prioritized arbiter in BoSy input format that is part of the 2020 SYNT-COMP benchmarks [26].

```
{
  "semantics": "mealy",
  "inputs": [
    "r_m",
    "r_0"
  ],
  "outputs": [
    "g_m",
    "g_0"
  ],
  "assumptions": [
    "(G (F (! (r_m))))"
  ],
  "guarantees": [
    "(true)",
    "(G ((! (g_m)) || (! (g_0))))",
    "(G ((r_0) -> (F (g_0))))",
    "(G ((r_m) -> (X ((! (g_0)) U (g_m)))))"
  ]
}
```

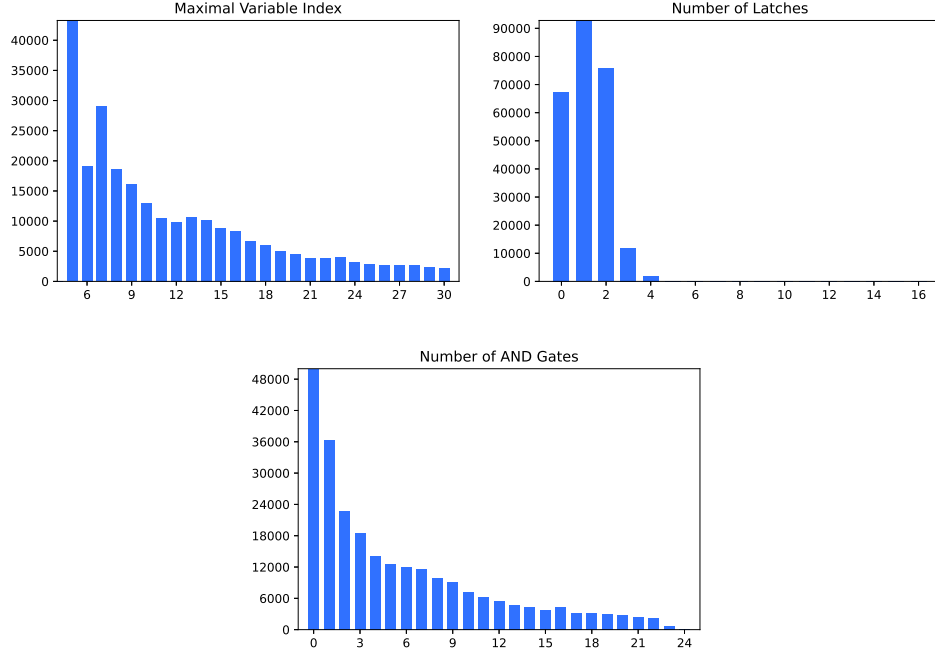

Figure 8: Distribution of maximal variable index, number of latches, and number of AND gates in the dataset.

| $d_m$ | $d_{ff}$ | $n_{loc}$ | $n_{glob}$ | $n_{dec}$ | $n_{heads}$ | Beam Size 1 | Beam Size 16 |
|-------|----------|-----------|------------|-----------|-------------|-------------|--------------|
| 256   | 1024     | 4         | 4          | 8         | 4           | 51.6 (28.9) | 81.3 (39.8)  |
| 128   | 512      |           |            |           |             | 50.7 (28.4) | 76.6 (40.6)  |
| 128   | 512      | 2         | 2          | 4         |             | 50.3 (28.0) | 76.6 (42.7)  |
| 256   | 256      |           |            |           |             | 54.5 (30.6) | 81.5 (43.8)  |
| 256   | 512      |           |            |           |             | 53.4 (30.9) | 78.6 (44.5)  |
| 512   | 512      |           |            |           |             | 23.3 (4.9)  | 57.4 (26.5)  |
|       |          | 2         | 2          | 4         |             | 52.8 (30.9) | 79.0 (43.1)  |
|       |          | 2         | 2          |           |             | 50.6 (27.9) | 77.1 (40.5)  |
|       |          | 2         | 6          |           |             | 49.9 (25.4) | 79.1 (41.2)  |
|       |          | 3         | 3          | 6         |             | 50.5 (28.9) | 76.8 (40.0)  |
|       |          |           |            | 4         |             | 53.8 (30.4) | 78.0 (42.0)  |
|       |          | 5         | 5          | 10        |             | 15.8 (4.6)  | 45.9 (18.4)  |
|       |          | 6         | 2          |           |             | 46.2 (27.3) | 74.1 (41.0)  |
|       |          |           |            |           | 8           | 55.3 (31.5) | 78.9 (45.0)  |
|       |          |           |            |           | 16          | 53.6 (30.3) | 78.0 (44.5)  |

Table 3: Hyper-parameter search for parameters embedding dimension  $d_m$ , feed-forward network dimension  $d_{ff}$ , number of local encoder layers  $n_{loc}$ , number of global encoder layers  $n_{glob}$ , number of decoder layers  $n_{dec}$ , and number of attention heads  $n_{heads}$ . Empty cells have the same value as the base model (first row). For each choice we report the accuracy on Testset for beam size 1 and beam size 16 with syntactic accuracy in parenthesis.

42 41 35

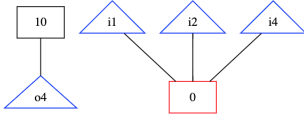

Figure 9: The largest circuit that satisfies a specification on which the classical tool times out.
